# Supplementary material
Source: PubMed Central journal article supplement (PMC5659724)
Supplement: NIHMS840463-supplement.pdf [file NIHMS840463-supplement.pdf]

# Supplemental Figures

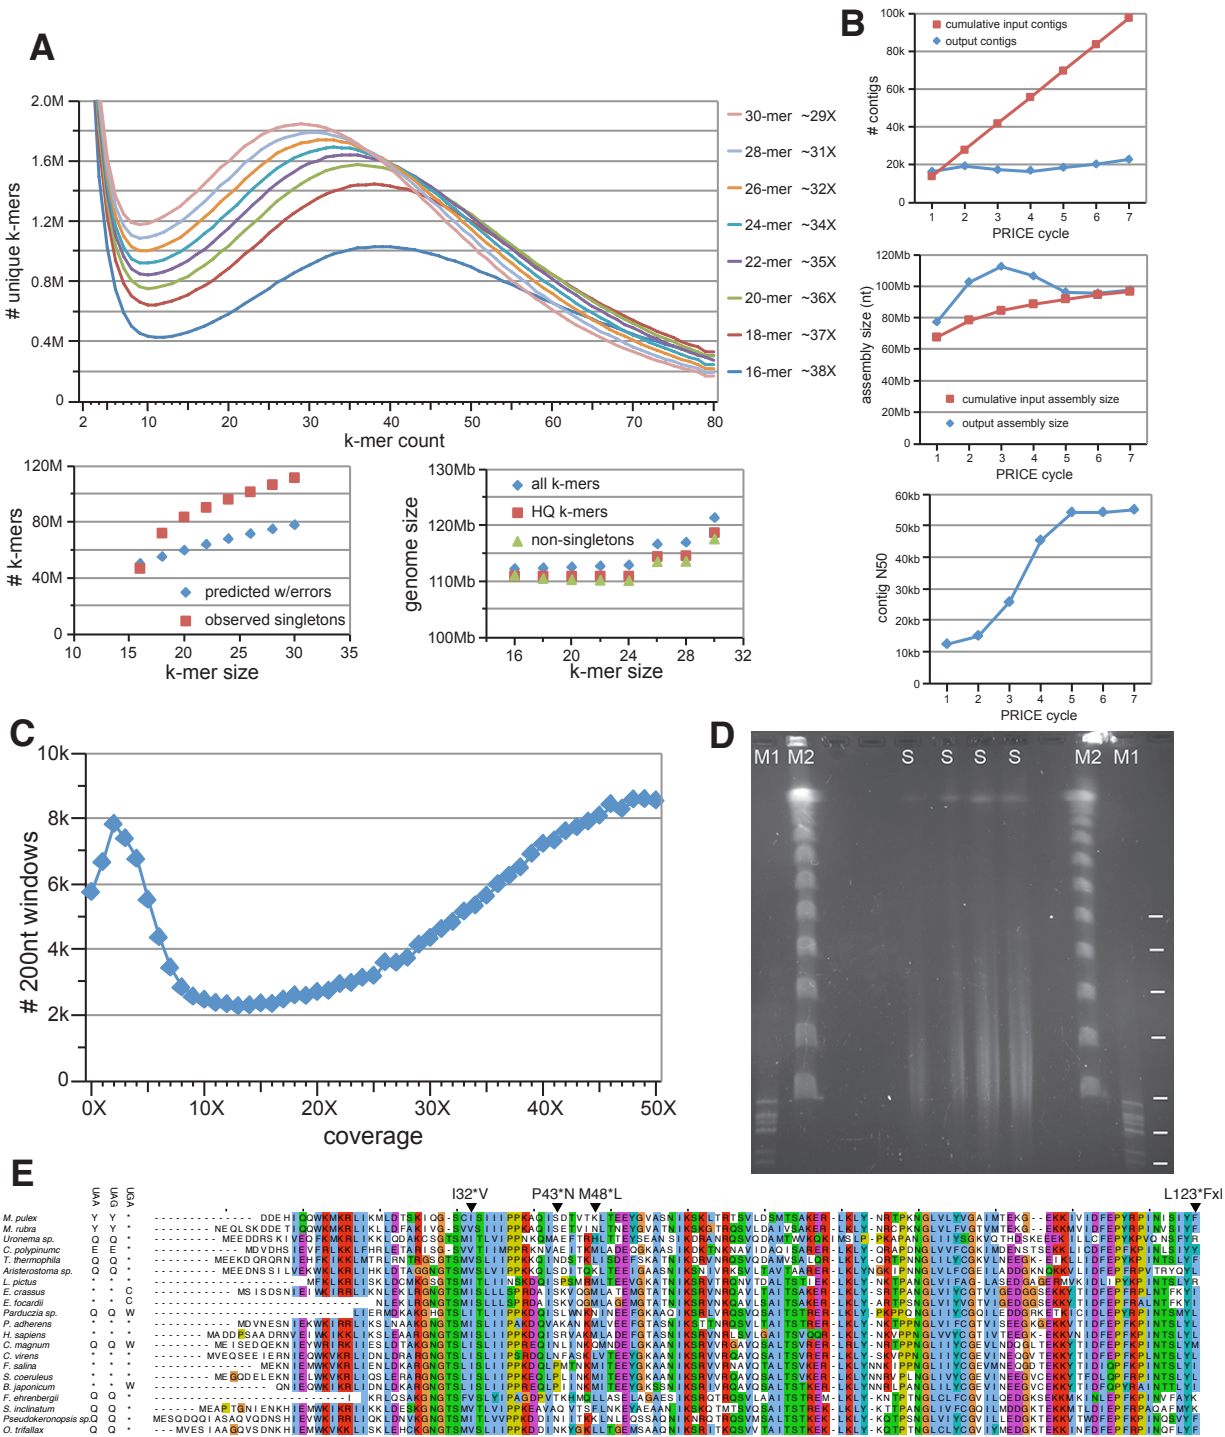

**Figure S1. Features of the de novo assembly of the *Stentor* genome.** (A) Estimating sequencing coverage based on k-mer counting. The distribution of k-mer frequencies was used to determine a typical level of sequencing coverage based on the modal value of the right peak of the distribution. (B) Progress of the initial PRICE extension of the SOAPdenovo assembly through 7 cycles of contig extension. Contig number, total assembly size, and contig N50 are plotted as a function of cycle number, along with the total number/size of SOAP contigs that had cumulatively been added to the assembly by the beginning of each cycle. (C) Coverage distribution of non-overlapping 200nt windows across an intermediate genome assembly; based on this plot, 10X was used as a cut-off value for eliminating low-coverage sequences that were likely to derive from mis-assembly or from contaminants (see Methods). (D) CHEF gel of *Stentor* DNA samples. M1, lambda DNA monocus ladder; M2, lambda PFG ladder; S, *Stentor* DNA samples in agarose plugs. White tick marks, from top to bottom - 242.5 kb, 194 kb, 145.5 kb, 97 kb, 48.5 kb, 24 kb, 15 kb. (E) N-terminal alignment of eRF1 based upon Supplemental Figure S7 from [S1]. Indicated are amino acid changes previously proposed to result in alteration of the recognition of stop codons [S2], which no longer appear to consistently explain alterations observed in ciliates as additional sequences have been added to this alignment. This figure supplements the data presented in Figure 1 of the main text.

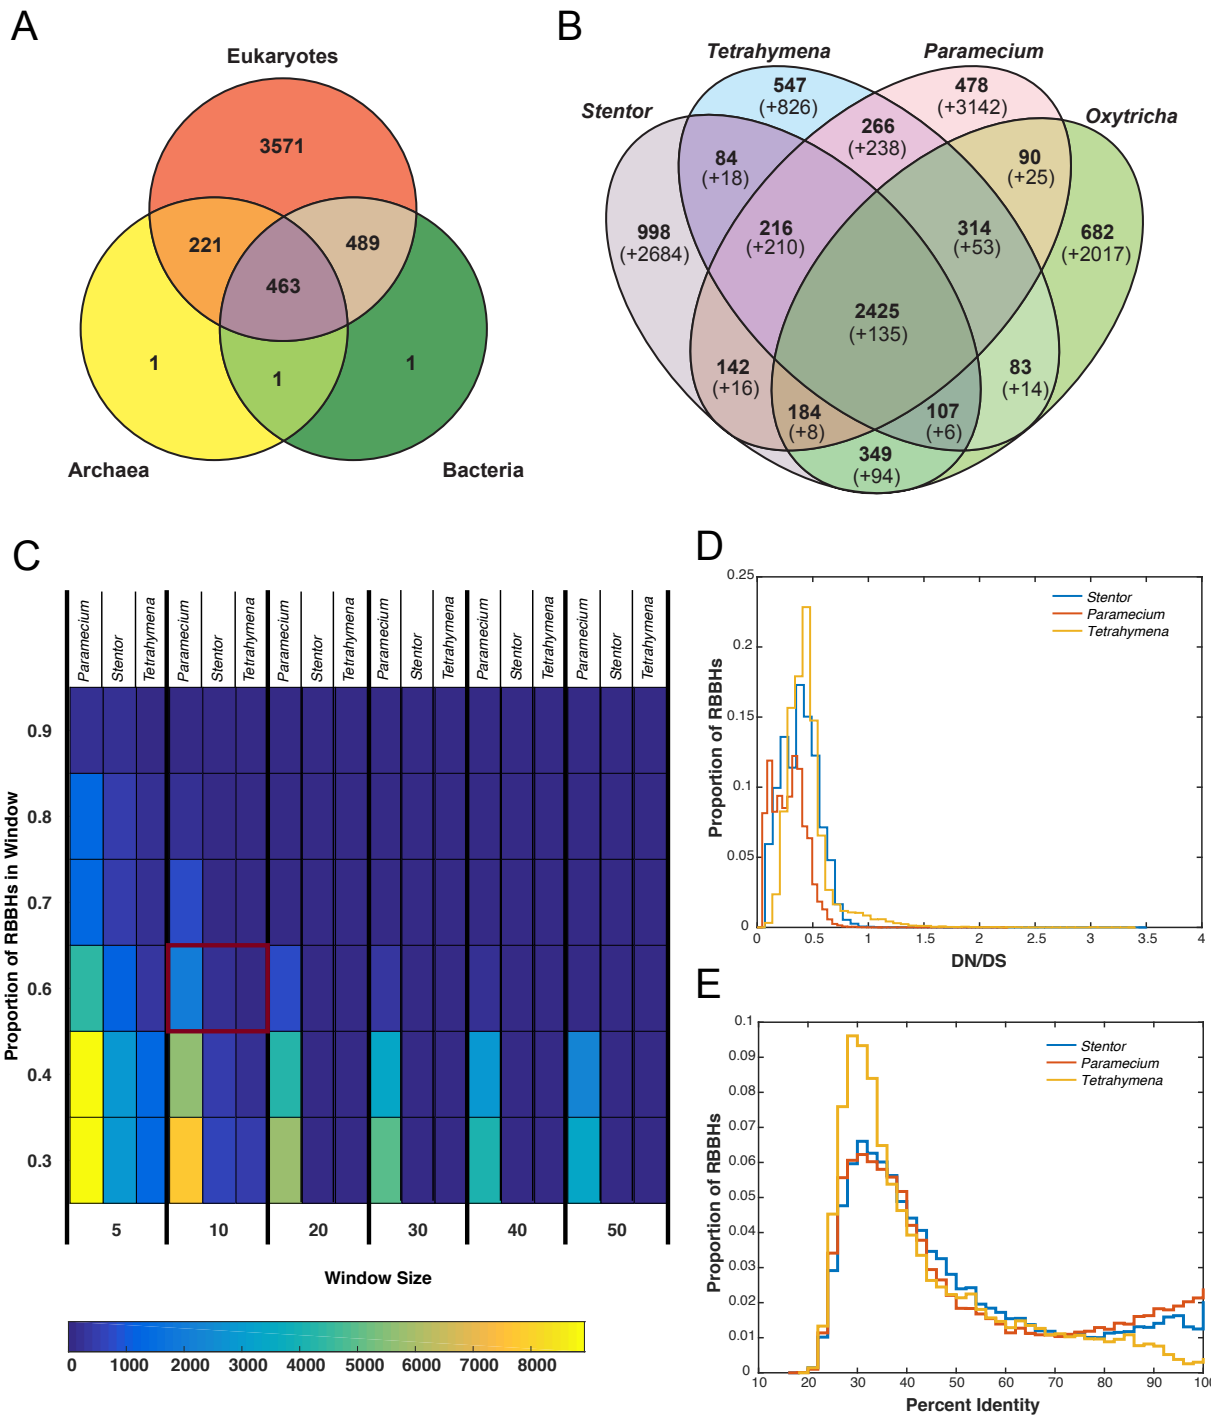

**Figure S2. Orthology grouping of *Stentor* genes.** (A) Venn diagram showing phyletic grouping of *Stentor* gene groups with the three domains of life. Includes curated orthology groups from OrthoMCL only. (B) Venn diagram

showing shared orthology of gene groups from *Stentor* and three other ciliates. Bold numbers represent gene groups that are also found outside ciliates; numbers in parentheses represent gene groups that are exclusive to ciliates. **(C)** Effect of variation in criteria used for detecting duplicated syntenic blocks, depicted here for *Paramecium*, *Tetrahymena* and *Stentor*. Window size is the number of successive RBBHs analyzed. Red outline indicates the detection criteria used to generate Figure 2A of the main text. **(D)** Non-synonymous to synonymous substitution rates among *Paramecium*, *Tetrahymena* and *Stentor* for RBBHs. **(E)** Percent identity between RBBHs identified in the *Paramecium*, *Tetrahymena* and *Stentor* genomes. This figure supplements data presented in Figure 2 of the main text.

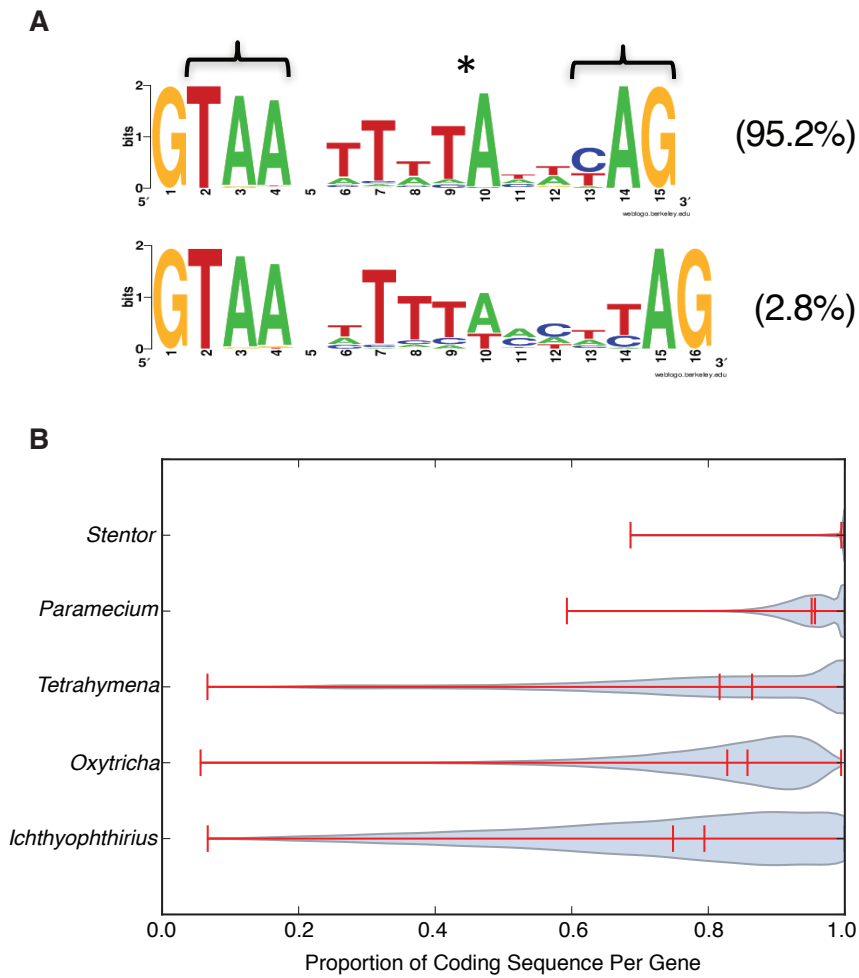

**Figure S3. (A) Intron size in *Condyllostoma*.** As with *Stentor*, nearly all identified introns in the related heterotrich *Condyllostoma magnum* [S1] are 15nts (95.2%, top) or 16nts (52.8%, bottom). *Condyllostoma* introns also display the same unusual features as *Stentor* introns including an abbreviated 5' splice site motif, atypical internal TA

dinucleotide (asterisk), and potential stop codons (brackets). **(B) Fraction of coding sequence per gene for select ciliates.** We compared the fraction of coding sequence per gene in *Stentor* with a selection of ciliates for which there are well-annotated gene models. For each of these ciliates, we show a violin plot which describes the distribution of this fraction. Whiskers indicate minimum and maximum values as well as both the mean and median of the distributions. Of note is that most of the genes found in the *Stentor* genome are entirely coding, so that the bulk of the distribution is at 1. The mean proportion of coding sequence per gene in the *Stentor* genome is 0.995. This figure supplements data presented in Figure 3 of the main text.

**Table S1: Comparison of *Stentor coeruleus* macronuclear genome size with that of other ciliates.** Related to Figure 1.

|                                           | Genome Size (MB) | Gene Number |
|-------------------------------------------|------------------|-------------|
| <i>Stentor coeruleus</i> [this study]     | 83               | 34,506      |
| <i>Paramecium tetraurelia</i> [S22]       | 72               | 40,000      |
| <i>Tetrahymena thermophila</i> [S30]      | 105              | 27,000      |
| <i>Ichthyophthirius multifiliis</i> [S31] | 49               | 8,100       |
| <i>Oxytricha trifallax</i> [S17]          | 50               | ~18,400     |
| <i>Stylonychia lemnae</i> [S26]           | 50               | 15,102      |
| <i>Euplotes octocarinatus</i> [S29]       | 89               | -           |

**Table S2. Orthologous gene groups in *Stentor*.** A list of all predicted *Stentor* genes and the ortholog groups they were sorted into, as well as the phyletic distributions of genes in each ortholog group. [available for download from Mendelay Data doi:10.17632/37gp2djct.1] Related to Figure 2.

**Table S3. Intergenic Lengths in *Stentor* and other ciliate genomes.** Related to Figure 3.

|                                     | Mean Intergenic Length (bases) | Standard Deviation Intergenic Length (bases) |
|-------------------------------------|--------------------------------|----------------------------------------------|
| <i>Stentor coeruleus</i>            | 2158.5                         | 2733.0                                       |
| <i>Paramecium tetraurelia</i>       | 2070.9                         | 3049.6                                       |
| <i>Tetrahymena thermophila</i>      | 4986.1                         | 7393.0                                       |
| <i>Ichthyophthirius multifiliis</i> | 7465.2                         | 8145.3                                       |
| <i>Oxytricha trifallax</i>          | 559.8                          | 856.3                                        |

**Table S4. Table of correlation coefficients for raw ddPCR data. P-values calculated from Vassar online statistical calculator (<http://vassarstats.net>).** Related to Figure 4.

| Contig number | Size (bases) | correlation coefficient | n  | P value  |
|---------------|--------------|-------------------------|----|----------|
| 2             | 233043       | 0.68                    | 23 | 1.94E-04 |
| 18            | 164593       | 0.80                    | 15 | 1.82E-04 |
| 558           | 46105        | 0.56                    | 23 | 2.63E-03 |
| 1255          | 20125        | 0.46                    | 8  | 1.26E-01 |
| 1700          | 10437        | 0.59                    | 8  | 6.30E-02 |
| 2224          | 4287         | 0.40                    | 8  | 1.65E-01 |
| 2227          | 4280         | 0.56                    | 23 | 3.00E-03 |

**Table S5. Table of Selenoprotein gene models.** Related to Figure 3.

| gene          | annotation             | contig             | start | end   | strand |
|---------------|------------------------|--------------------|-------|-------|--------|
| SteCoe_g40903 | glutathione peroxidase | SteCoe_contig_4    | 5629  | 6135  | +      |
| SteCoe_g40904 | glutathione peroxidase | SteCoe_contig_122  | 51947 | 52444 | -      |
| SteCoe_g6726  | glutathione peroxidase | SteCoe_contig_94   | 61704 | 62234 | -      |
| SteCoe_g21264 | glutathione peroxidase | SteCoe_contig_501  | 1252  | 1758  | -      |
| SteCoe_g16643 | glutathione peroxidase | SteCoe_contig_334  | 13296 | 13826 | +      |
| SteCoe_g40905 | glutathione peroxidase | SteCoe_contig_1253 | 9497  | 10018 | -      |
| SteCoe_g26857 | glutathione peroxidase | SteCoe_contig_763  | 17484 | 17933 | +      |
| SteCoe_g4842  | thioredoxin reductase  | SteCoe_contig_62   | 62790 | 64337 | +      |

## Supplemental Experimental Procedures

### *Strains, media and growth conditions*

*Stentor coeruleus* cells were obtained commercially (Carolina Biological Supply, Burlington, NC) but subsequently maintained in culture within the lab by growing in the dark at 20°C in Modified *Stentor* Medium (MSM), 0.75 mM Na<sub>2</sub>CO<sub>3</sub>, 0.15 mM KHCO<sub>3</sub>, 0.15 mM NaNO<sub>3</sub>, 0.15 mM KH<sub>2</sub>PO<sub>4</sub>, 0.15 mM MgSO<sub>4</sub>, 0.5 mM CaCl<sub>2</sub>, 1.47 mM NaCl modified from the original recipes described by Tartar and De Terra. This medium provides no nutrients and must be supplemented with living prey. We use *Chlamydomonas reinhardtii* grown separately in TAP medium and washed in MSM before being added to the *Stentor* cultures for feeding, but also include boiled wheat seeds in the cultures to promote additional microbial growth and give the *Stentor* fibrous material on which to anchor. 300mL *Stentor* cultures are given  $3 \times 10^7$  *Chlamydomonas* cells two or three times per week and grown with four wheat seeds. *Stentor* cultures are available upon request.

### *Stentor Imaging*

To image cells for Figure 1, cells were starved for 24 hours and washed in sterilized media 2-3 times. Cells were fixed in ice cold Methanol for 10 minutes at -20° C and then incubated at room temperature in a 1:1 Tris-buffered saline (TBS):Methanol solution for 5 minutes. Here, we use a standard formulation for TBS: 0.05 M Tris and 0.15 M sodium chloride, pH 7.6, made in water. Following another room temperature incubation in TBS for 10 minutes, cells were blocked in a mixture of 2% BSA, 1xTBS, 0.1% Triton X-100 and 0.1% Sodium Azide for one hour at room temperature. Finally, cells were incubated with primary antibodies diluted in blocking mixture for one hour at room temperature. Cells were washed 3 times in TBS and then incubated with secondary antibody for 1 hour in the dark at room temperature. Cells were washed and mounted for visualization using a Deltavision Spectris deconvolution microscope. Brightfield images of *Stentor* cells were taken on a Zeiss AxioZoom microscope.

For volume estimation in Figure 4, living cells were imaged in the contracted state so that they became ellipsoidal, and volume was calculated from the axes of the ellipse of a cross section, assuming radial symmetry.

### *Genomic DNA isolation*

300 cells from a clonal population (that was not inbred initially) were manually isolated and washed 3x in fresh MSM and incubated without additional food for 48 hours. After starvation, cells were again washed 3x in MSM and isolated in minimal media. Genomic DNA was isolated using the DNeasy Blood and Tissue kit (Qiagen), following



the suspension cell protocol, and eluting in 75  $\mu$ L yielding 3 $\mu$ g. Whole cell DNA was isolated, and thus should contain DNA from both the macronucleus as well as the micronucleus, however we expect that the vast majority of the reads will be derived from the macronuclear genome for two reasons. First, when inspected by DAPI staining there are no micronuclei visible in our Carolina strains. Secondly, even if there are micronuclei present, the DNA content of the macronucleus is present at a copy number of approximately 50,000-100,000 (see Figure 4), while micronuclear genomes are present at single or a few copies, so that any micronuclear contamination would be present at levels less than a ten thousandth of the macronuclear DNA. We suspect that the cells in our cultures do contain micronuclei as we observe rare events of mating and are currently developing methods to better identify micronuclei using various approaches including immunofluorescence. Additionally, samples were checked for contamination with DNA from *Chlamydomonas reinhardtii* (the food source on which the cells had been grown) using PCR amplification of the *Chlamydomonas* mating type locus, but no bands were detected, confirming that our starvation and washing protocol eliminated the majority of the food cells.

### **Genomic DNA library preparation and sequencing**

Paired-end sequencing libraries were prepared from 100 ng of genomic DNA using Nextera DNA sample preparation kit, Rev. A October 2011 (Illumina) following the manufacturers protocol. Libraries were sequenced using the HiSeq 2000 with Illumina's HiSeq paired-end cluster generation kit and HiSeq sequencing kit for 2 x 100 bp reads. Illumina paired-end sequencing on two lanes of a flow cell yielded a total of 629,226,200 paired-end 100nt reads (314,613,100 pairs total; lane 5: 156,618,004 pairs; lane 6: 157,995,096 pairs), with a median insert size of 130 nt. For each lane, sequences were 3' truncated if a 90%-identity ungapped alignment was found to the beginning of the Illumina adapter sequence: CTGTCTCTTATACA. Partial matches at the 3' end of each read were allowed, removing the overlapping portion of the putatively adapter-derived sequence. Paired-end reads were culled if either read of the pair was shortened to <97nt. This left 109,273,816 pairs (lane 5: 55,215,100 pairs; lane 6: 54,058,716 pairs).

### **Clamped homogeneous electric fields (CHEF) methods**

To create agarose plugs, we used a modified version of the protocol from [S3] omitting zymolyase treatment. Briefly, *Stentor* were collected and excess media removed until the cells reached a concentration of ~100 cells per 50  $\mu$ L. Cells were gently mixed with an equal volume of 1.25% low-melt agarose solution (50C), and pipetted into plug molds (100  $\mu$ L each). Plugs were allowed to solidify, then incubated with Proteinase K overnight at 55C. The following day, the cells were washed four times for an hour each, then stored at 4C.

For pulsed field gel electrophoresis, we used the CHEF-DR II System (Bio-Rad). Briefly, we ran agarose plugs of *Stentor* in a 1% gel made from Pulsed Field Certified Agarose (Bio-Rad) in 0.5X TBE. Lambda DNA MonoCut Mix and Lambda PFG Ladder (New England Biolabs) were used as size standards. The gel was run at 6 V/cm<sup>2</sup> with a 5s initial switch time and a 30s final switch time, for 20h at 14C. Afterwards gel was stained with ethidium bromide.

### **K-mer counting analysis**

K-mer count histograms were generated using the filtered read data from above and the k-mer-counting software Jellyfish (v1.1.6) [S4]. Histograms for each even k-mer size over the range 16-30 were generated, and the mode of the right peak was estimated to determine the average fold coverage (**Fig S1A**). That number was used to divide the total number of k-mers in the dataset to yield an estimate of ~110Mb across k-mer sizes of 16-24nt, with the estimate for larger k-mers possibly amplified by genetic polymorphism or sequencing errors (**Fig S1A**). Two attempts were made to address sequencing errors: first, the calculation was performed removing all singleton k-mers from the count of total k-mers, presuming those to be the result of sequencing errors. Second, the quality scores of all nucleotides from the input dataset were used to estimate the number of k-mers in the datasets deriving from miscalled nucleotides. For each possible nucleotide score allowed by the fastq file format, the number of nucleotides with that score was determined. The average number of k-mers overlapping a nucleotide was estimated as  $k * (R - k + 1) / R$ , where  $k$  = k-mer size and  $R$  = read length. The number of nucleotides with a given score was multiplied by the probability of a nucleotide with that score being incorrect (for these files,  $10^{((64 - Q) / 10)}$  where  $Q$  is the quality score). Those products were summed across scores, and the resulting tally multiplied by the number of k-mers expected to be affected by a mis-called nucleotide in order to arrive at an estimate of the number of erroneous k-mers. Neither error-inclusion method significantly altered the k-mer-counting size estimate (**Fig S1A**). We used this estimate to determine cutoffs for eliminating low-coverage sequences as described below.

### ***Initial contig synthesis using SOAPdenovo***

Initial scaffolds were generated using SOAPdenovo v1.05 [S5] with both lanes of adapter-filtered data described above, using the following command: “./SOAPdenovo-63mer all -K 63 -p 80 -R -s [config file] -o [output file prefix]”. The config file made the following specifications for both data sets: “pair\_num\_cutoff=3, avg\_ins=250, asm\_flags=3, reverse\_seq=0, map\_len=90, rank=1, rd\_len\_cutoff=100”. SOAPdenovo assembly was followed by running of the SOAPdenovo GapCloser program [S5] on the scaffold output from SOAPdenovo and the config file from that run. By using the scaffold output from SOAPdenovo, instead of just the contig output, larger inserts could be used to generate scaffolds. The output file was re-formatted from fasta to priceq format as described in the next paragraph. The 201,835 scaffolds, totaling 111,219,579nt in length, were fed into the PRICE assembler (v0.18, <http://derisilab.ucsf.edu/software/price/>) [S6] without any read data for a collapse of redundant sequences using the following command: “./PriceTI -icf [priceq-formatted SOAP output file] 1 1 1 -TPI 95 -nc 1 -a 20 -o [fasta-format output file]”. That collapse yielded 139,937 “contigs” (collapsed scaffolds that may have become contiguous in the process) of 101,837,818 nt total length. The PRICE-collapsed scaffolds were cut at any stretch of 2 or more consecutive uncalled nucleotides (N's), with terminal N's trimmed from the split-apart contigs, and contigs <100nt removed, yielding 140,051 contigs totaling 101,833,627nt in length. That fasta file was reformatted to priceq format as described below.

Fasta-format contig files were converted to priceq-format, a format specifically designed for compatibility with the PRICE assembler (though not required for its functionality) using BLAT [S7] to align reads to the SOAPdenovo contigs. Reads were aligned requiring 90% identity across the entire read. Coverage of reads across each nucleotide of each contig was then transformed into a priceq scores using the formula specified for that file format (<http://derisilab.ucsf.edu/software/price/>) [S6]. Reads overlapping two consecutive nucleotides contributed a count to the phosphodiester score between those nucleotides. The resulting tallies were written out in priceq format and used for further assembly steps.

Manual examination of the resulting contigs revealed a large number of contigs that began with repeats of the 8nt sequence “CCCTAACA”. This repetitive motif only occurred at the 5' ends of contigs, with repeats of the complementary sequence “TGTTAGGG” appearing repeatedly at the 3' ends of contigs. We presumed that this sequence derives from telomeric sequence, and filtered it as a repetitive sequence from extending contigs during the PRICE assembly described below.

### ***Contig extension and collapse using PRICE***

The contigs generated by SOAPdenovo were extended and collapsed using the PRICE assembler (v0.18, <http://derisilab.ucsf.edu/software/price/>) [S6], which was developed for assembly of metagenomic datasets. Metagenomic assembly is appropriate because our sequencing library constructions used total DNA isolated from *Stenotor* cells, which includes DNA from the macronuclear genome but also from mitochondria and the micronucleus. We note, however, that although our library used total DNA, the vast majority of DNA in the cell is present in the macronucleus, so much so that micronuclei are not even detectable when whole fixed cells are stained with DNA dyes (**Figure 1B**). Whereas the micronucleus is diploid and thus contains two copies of the genome, we have found (**Figure 4**) that the macronucleus is on the order of 100,000-ploid. We thus expect that any micronuclear DNA present in our sample would only constitute a miniscule fraction of the total library. Nevertheless, PRICE provides an additional layer of robustness because of its established ability to separately assemble genomes from metagenomic mixtures. We executed PRICE using the following command: “./PriceTI -icf [seed priceq file] 10 1 1 -fpp [filtered read files, lane 5] 250 97 -fpp [filtered read files, lane 6] 250 97 -badf [telomere fasta file] 80 -lenf 100 0 -TPI 95 -targetF 95 0 -rnf 95 -nc 10 -a 20 -o [output fasta and priceq-format files]”. The “telomere fasta file” contained a single sequence entry: the telomere repeat 8-mer “CCCTAACA” (see above) repeated consecutively 30 times. Although that job was set to run for ten cycles of extension, it was terminated after seven cycles, in each cycle importing an additional 14,005 contigs from the input contig file. The resulting output included 23,016 contigs with a total length of 97.7Mb and a contig N50 of 55.2kb (**Fig S1B**).

### ***Error correction using PRICE modules***

Several strategies were implemented to address assembly artifacts of unknown origin that were evident from manual inspection of the assembly, and confirmed by PCR to be errors. Scripts to address each area available for download from <http://derisilab.ucsf.edu/software/price/accessories/>. First, short stretches of sequence were found to be tandemly duplicated at many genomic loci, generally with two copies of near-perfect identity separated by a single “N”. Such tandem duplications were collapsed using the script “correctShortTandem.py”, which for each specified repetitive region performs a gapped self-against-self alignment and, if an alignment is found meeting

minimum percent identity and length requirements, collapses the tandem duplication into a single copy. This script was run many times in succession, as multiple tandem duplications could at most be reduced in copy number by half. A minimum percent identity of 90% was specified for collapsing redundant sequences.

Following the collapse of tandem repeats, BLAT [S7] was used as above to generate coverage maps of the genome assembly. Reads mapping to multiple genomic loci had their counts normalized across all the loci to which they could be mapped with an equal (highest) score. The coverage distribution for genomic loci, defined here as non-overlapping 200nt bins, was bimodal (**Fig S1C**). Given the observed distribution, 200nt blocks of sequence with <10X coverage were removed from the genome assembly using “correctLowCovRegions.py”

(<http://derisilab.ucsf.edu/software/price/accessories/>), changing the contig count/total assembly size/contig N50 to 23,670 contigs / 92.4Mb / 40.4kb. Those contigs were provided to PRICE for a no-read-input cycle to collapse redundant contigs (v1.0.1, “.PriceTI -icf [contig fasta file] 1 1 10 -nc 1 -MPI 97 -TPI 25000 -o [fasta/priceq output file]”). That yielded a contig count/total assembly size/contig N50 of 22,187 contigs / 89.4Mb / 41.2kb.

An additional cycle of PRICE with reads was launched, this time using adapter-trimmed reads from above that were further filtered for high-quality read pairs only using PriceSeqFilter (v1.0.1 “-rqf 95 .99”). That cycle, run using PRICE v1.0.2, used the following command: “.PriceTI -icf [input contig file] 1 1 10 -MPI 97 -TPI 25000 -fpp [quality-filtered lane 5 reads] 250 97 -fpp [quality-filtered lane 6 reads] 250 97 -badf [telomere repeat file] 80 -lenf 200 0 -targetF 98 0 -nc 5 -mol 30 -o [fasta/priceq output file]”. Though specified for five cycles, that job was terminated after a single cycle, yielding a contig count/total assembly size/contig N50 of 19,940 contigs / 95.5Mb / 48.9kb. Tandem-repeat correction was repeated, not significantly altering the assembly size statistics.

Using coverage maps again generated with BLAT, low- and high-coverage regions of the assembly were split away from the rest of the genome using the script “correctLargeRepeats.py” (<http://derisilab.ucsf.edu/software/price/accessories/>). High-coverage regions were defined using a 5nt-resolution coverage map of the genome generated with all quality-filtered reads (“-mc 600 1200 -hl 40 -ll 2000 -he .72 .11 .17 -le .19 .09 .72”), as were low-coverage regions (“-mc 10 15 -hl 200000 -ll 200000 -he .6 .2 .2 -le .2 .2 .6 -low”). The high-coverage and average-coverage genomic blocks were re-collapsed using a price no-read, collapse-only, single-cycle run (v1.0.3; “.PriceTI -icf [high-coverage file] 1 1 10 -icf [medium-coverage file] 1 1 10 -MPI 95 -TPI 100000 -nc 1 -o [output fasta file]”). That yielded a contig count/total assembly size/contig N50 of 15,384 contigs / 88.5Mb / 47.4kb.

The alignment of contigs to NT revealed some with high-identity matches to sequences from *Janthinobacterium agaricidamnosum* NBRC 102515 (taxid 1349767). Contigs were isolated from the larger assembly if they shared more than 50% of their sequence with the *J. agaricidamnosum* genome (HG322949; unpublished direct submission) at >80% identity when aligned by Blastn [S8], or with annotated proteins from that species >100 amino acids in length that could be aligned by blastx with a proteome-specific expect value of <1e-5 and >80% identity. Contigs thus isolated were subjected to further cycles of PRICE extension and consolidation. A more limited number of contigs were aligned and assigned to *E. coli* (CU928161.2; direct submission). No satisfactory matches were found to the *Chlamydomonas reinhardtii* genome (confirming our PCR results described above), nor to the *Triticum urartu* (wheat) genome, suggesting that during our starvation and washing procedure prior to DNA isolation, the food sources (*Chlamydomonas* cells and wheat seeds) were largely removed. Matches were found to the *Triticum aestivum* genome assembly (assembly ID GCA\_000334095.1), but those were found to have equally good matches to the genome of bacteriophage S13. Additional blast searches revealed a limited number of contigs with high-quality matches to common laboratory plasmids; these were presumed to derive from laboratory contaminants and are presented separately.

### Analysis of bacterial contaminating sequences by PCR

Because our initial assembly contained a contig consisting of bacterial sequences, we tested whether this contig represented bacterial contamination using a PCR approach. DNA samples were prepared from whole cells. Single cells were washed 3x in MSM, isolated in 10 µL, and then incubated in 9 µL 2x PCR buffer and 1 µL proteinase K (New England Biolabs, Ipswich, MA) for 1 hr at 55°C. The proteinase K was heat inactivated at 95°C for 10 min and the resulting solution was used as a DNA template for PCR reactions using the following primers:

| Target                              | Forward Primer           | Reverse Primer               |
|-------------------------------------|--------------------------|------------------------------|
| <i>Chlamy</i> P2 (Plus mating type) | GCTGGCATTCTGTATCCTTGACGC | GCGGCGTAACATAAAGGAG<br>GGTCG |

|                                      |                            |                              |
|--------------------------------------|----------------------------|------------------------------|
| <i>Chlamy</i> M3 (Minus mating type) | CGACGACTTGGCATCGACAGGTGG   | CTCGGCCAGAACCTTTCATAGGGTGG   |
| <i>Janthinobacterium</i> sequence    | GCAAGCATTATCTGGCGGTG       | TCGAGCAGCGATTCTGATC          |
| <i>Stentor</i> $\beta$ -tubulin      | ATGAGAGAAATTGTTACGTACAAGGC | GGAGTAGTGAGCTTAAGAGTTCTGAAGC |

PCR using the *Janthinobacterium* specific primers of bacterially contaminated MSM media (produced by adding wheat seeds to MSM media and growing in open air), revealed distinct bands that differed in size from the predicted product from the assembled *Janthinobacterium* sequence in our assembly. In all cases, Sanger sequencing of these amplification products identified sequences homologous to several different soil bacteria (*Mesorhizobium* and *Thuaera*). In no case did these amplification products exactly match the *Janthinobacterium* sequence. These same primers failed to amplify any bacterial sequences from *Stentor* cells that had been carefully washed from their growth media. We therefore conclude that the *Janthinobacterium* reads that were assembled in our genome assembly represent contamination from the growth media during our initial sample preparation, and not an endosymbiotic bacterium within the *Stentor* cells themselves. The contig was therefore removed from the final assembly.

#### **Analysis of SNP density**

Since our genome was not sequenced from an inbred population of cells, we sought to assess the heterozygosity of the genome by measuring the SNP density. To this end, we employed three different approaches. The first approach is a reference-free approach to identify SNPs, DiscoSNP++ [S9], which we run with default settings, including those for mapping back to the genome. Using VCFtools [S10], we analyzed the SNP density [parameter: --SNPdensity 1500] and identified 1.4 SNPs in windows of 1500 bases. The next two approaches were referenced based approaches. First, we used a combination of samtools mpileup [parameters: -uf ] [S11-S13] and bcftools [parameters: bcftools call -c -v -o b, followed by vcftutils.pl varFilter -D100] (<http://samtools.github.io/bcftools/call-m.pdf>). Using vcftools as above, we identified 1.2 SNPs in windows of 1500 bases. The final approach we used was based upon the Genome Analysis Tool Kit (GATK) [S14,S15], following published best practice protocols [S16]. Using VCFtools, we found 4.1 SNPs in windows of 1500 bases. SNP density was consistent across all contigs. In particular the SNP density on the contig containing the rDNA locus was comparable to the genome as a whole.

#### **Detection of telomeres**

In order to identify contigs that are capped on one or both sides by telomeric sequences, we created a library of reads containing telomeric sequences. Following the approach of [S17] we selected all paired reads matching the regular expression CCCTAACA[CAN]\*, masking all matches with a single N. We restricted future analysis to all pairs where both reads were  $\geq 30$  bp long (259,312 pairs). We mapped all reads to the genome assembly using gmap version 2.2.3 in paired mode with the following flags: -p col-bw -h 80 -I 0,30000 -N 16. We then searched for contigs with at least 10 reads mapping to either end.

#### **RNA Isolation and cDNA synthesis**

RNA was isolated from *S. coeruleus* cultured cells growing vegetatively using the RNeasy kit (Qiagen, Venlo, Netherlands), following the manufacturer's instructions. RNA for mRNA-seq libraries was isolated from two samples of 1000 cells each, and RNA used for traditional cDNA synthesis or for RACE was isolated from 500 cell samples. cDNA synthesis was performed using the SuperScript III First Strand Synthesis System (Life Technologies, Carlsbad, CA), following the manufacturer's instructions and priming with oligo-dT.

#### **Sanger sequencing and RACE**

For Sanger sequencing of cDNA and genomic DNA regions, we selected gene models generated by either CEGMA (<http://korflab.ucdavis.edu/datasets/cegma/>) or MAKER (which we initially used to predict genes based on homology to related ciliates) (<http://www.yandell-lab.org/software/maker.html>) that were predicted to have at least one intron. The following primers were designed to contain predicted start and stop codons of these putative genes:

| Primer Name           | Sequence                                    |
|-----------------------|---------------------------------------------|
| SteCoe_contig_916-1F  | 5'- ATG GAG TAT CTG GAA ACT TTA CC -3'      |
| SteCoe_contig_916-1R  | 5'- TTA ACT ATC TAT TTC CAT AGG GAC TTC -3' |
| SteCoe_contig_1057-1F | 5'- ATG GCA GCA ATC GGG GTA AG -3'          |
| SteCoe_contig_1057-1R | 5'- GAC ATA GCA AGC GAA AGG GC -3'          |
| SteCoe_contig_64-1F   | 5'- ATG AGT GGA GCT GGA ACA GG -3'          |
| SteCoe_contig_64-1R   | 5'- CTA CTC ACC ACG TTC TTC TCT TTC -3'     |
| SteCoe_contig_212-1F  | 5'- ATG TCG GGC CAT TAT TCC TC -3'          |
| SteCoe_contig_212-1R  | 5'- CTA ATA TCT TCT CGG GCT ACG AC -3'      |
| SteCoe_contig_78-1F   | 5'- ATG GAA AGC AGA AGA CTC C -3'           |
| SteCoe_contig_78-1R   | 5'- CAT TAA ATT ACC TAA GCT GAT GAT AG -3'  |
| SteCoe_contig_270-2F  | 5'- ATG ACT ACA CCT GCA AGA AGA AG -3'      |
| SteCoe_contig_270-2R  | 5'- TTA ACT ATT GCA CCA GGA GTC TTC -3'     |
| SteCoe_contig_172-1F  | 5'- ATG GAC TAT GTA GAA GTG GTC G -3'       |
| SteCoe_contig_172-1R  | 5'- CTA ATT CTC CTG ATC ACT CC -3'          |
| SteCoe_contig_3-1F    | 5'- ATG GCA CAG TTC TCA AGA TAT G -3'       |
| SteCoe_contig_3-1R    | 5'- CTA TCT ATC AAC TTC CAT ATC TTC ATC -3' |

These primers were then used to perform PCR from cDNA or genomic DNA with Phusion polymerase (New England Biolabs, Ipswich, MA). PCR products were then cloned into plasmids using the Zero Blunt TOPO PCR Cloning kit (Life Technologies, Carlsbad, CA).

RACE was performed using the SMARTer cDNA amplification kit (Clontech, Mountain View, CA), following the manufacturer's instructions. The following gene-specific primers were used:

| Primer Name               | Sequence                                      |
|---------------------------|-----------------------------------------------|
| SteCoe_contig_754-3'RACE1 | 5'- GGA AGA AGA AGA TAA TGG GCA GGG C -3'     |
| SteCoe_contig_754-5'RACE1 | 5'- CCA GTC TTG TAA GAA ACC CAA CGA GGC -3'   |
| SteCoe_contig_218-3'RACE1 | 5'- GAT TCG CCG ACA ATA CCT ACA CTG AGA G -3' |
| SteCoe_contig_218-5'RACE1 | 5'- GTT GAG ATT TCT GCT GTG ATG CTA CCG G -3' |
| SteCoe_contig_270-3'RACE1 | 5'- GCA ATG GAC CG CGT TTG GGA GC -3'         |

|                            |                                               |
|----------------------------|-----------------------------------------------|
| SteCoe_contig_270-5'RACE1  | 5'- AAC CCA TCC TTA TCA CAC ATG CAG CC -3'    |
| SteCoe_contig_295-3'RACE1  | 5'- GGG ATT GTT GGT GCC CAA GTC CCT GTT G -3' |
| SteCoe_contig_295-5'RACE1  | 5'- CAG CTC TTT AGC ATC AGG CAC AGG GTC -3'   |
| SteCoe_contig_884-3'RACE1  | 5'- GAA GAA GCG AGA CGA AGA ATT GCC CGA C -3' |
| SteCoe_contig_884-5'RACE1  | 5'- CCA GCA TGA ATA GCC GTA CTC GGA AAC C -3' |
| SteCoe_contig_1210-3'RACE1 | 5'- CAG AGC CAA TCT CAT CAT GGA GCC -3'       |
| SteCoe_contig_1210-5'RACE1 | 5'- CCC TGC TCT ACC TGC TCT TCC TAT CC -3'    |
| SteCoe_contig_127-3'RACE1  | 5'- CCT CCT GCT TCG TGA AGG AAC TGA CAC -3'   |
| SteCoe_contig_127-5'RACE1  | 5'- GAA TCT GCG TCC TCT GCC TCT TCC -3'       |
| SteCoe_contig_5-3'RACE1    | 5'- CTG GGA TAC AGC AGG TCA AGA ACG G -3'     |
| SteCoe_contig_5-5'RACE1    | 5'- CAG CAC TTC CCT TCA CCT TTC TTA TCC G -3' |
| SteCoe_contig_2266-3'RACE1 | 5'- CCT GGT AGT TGC TGC GAC TGA CGG C -3'     |
| SteCoe_contig_2266-5'RACE1 | 5'- GTT CCT GCT CCT GCT CCA TCC TCC -3'       |
| SteCoe_contig_1522-3'RACE1 | 5'- TGA GCG AGG TAT CAC CGT AAG AGC CC -3'    |
| SteCoe_contig_1522-5'RACE1 | 5'- CGT CCC TGA GTC AAC CCT AAC ATT TCC -3'   |
| SteCoe_contig_323-3'RACE1  | 5'- CGT GAC TCT CGG GTC TTT CTT ATC GGT G -3' |
| SteCoe_contig_323-5'RACE1  | 5'- TGC GTT TAC CAC ATT GAC AGC CCT TG -3'    |
| SteCoe_contig_282-3'RACE1  | 5'- GGG AGT CAA TGG CAG GAG GTA ACT TTG -3'   |
| SteCoe_contig_282-5'RACE1  | 5'- CCA GGA GGT CCA CAA TAG CAC ACA AGA G -3' |
| SteCoe_contig_79-3'RACE1   | 5'- CCA GTT GGT GCT GAC CTG TTT GTG ATT G -3' |
| SteCoe_contig_79-5'RACE1   | 5'- CTG GCT CTT CAA CCA TGC TCT TGA TAG C -3' |
| SteCoe_contig_698-3'RACE1  | 5'- CAA TCA AAC ACA CCA GCA ACC CTT CG -3'    |
| SteCoe_contig_698-5'RACE1  | 5'- ATC ACA GGT CGG TCC CCA AAT CAC AG -3'    |
| SteCoe_contig_275-3'RACE1  | 5'- CAG AAG AGT TTG GAA GCG GTT GGG -3'       |
| SteCoe_contig_275-5'RACE1  | 5'- GAC CCT GCT GTG ACT TGC CAG ATT TC -3'    |
| SteCoe_contig_1628-3'RACE1 | 5'- CAG CTT ATG GGC CAA GTG ACA ATC CGCC -3'  |
| SteCoe_contig_1628-5'RACE1 | 5'- CGA CAA CCG ACC CAT CAG GAA GTT C -3'     |
| SteCoe_contig_1010-3'RACE1 | 5'- GAA CTT GAT CCT CGT ATG GTT GCC G -3'     |
| SteCoe_contig_1010-5'RACE1 | 5'- GGT CCT TCC CCA TTG GCT TCT CTT AG -3'    |
| SteCoe_contig_1024-3'RACE1 | 5'- GAT CTT GGG ATT GGA GGA GCA GAA CAG -3'   |
| SteCoe_contig_1024-5'RACE1 | 5'- CGC TTG ATT GAA CTT TGA CGC TGG GTG C -3' |
| SteCoe_contig_184-3'RACE1  | 5'- CCT CCC CTC CCA ACA CCC GCA AG -3'        |
| SteCoe_contig_184-5'RACE1  | 5'- CTT GCG GGT GTT GGG AGG GGA GG -3'        |
| SteCoe_contig_939-3'RACE1  | 5'- GAT TAT CTC GCT GGT ACA CAA CAA TTC C -3' |
| SteCoe_contig_939-5'RACE1  | 5'- GCT TAG AAG TCT CTG TAA TTT CCC CTC C -3' |

RACE reactions were then analyzed on an agarose gel, and major products excised and TA-cloned into pCR2.1 with the TOPO TA Cloning kit (Life Technologies, Carlsbad, CA). Cloned RACE fragments, cDNA regions, and genomic DNA regions were all Sanger sequenced at Elim Biopharm (Hayward, CA) using M13 F and M13 R primers.

#### ***mRNA-seq Library Preparation and Sequencing***

5 ug total RNA was used to create a strand-specific mRNA-seq library, as previously described (Elliott R., 2013). Library quality was tested on a 2100 Bioanalyzer (Agilent, Santa Clara, CA). QC analysis was then performed by running a small amount of the libraries on an Illumina GAIIx to get 5-10M 50-bp single end reads from each library. After these reads were analyzed a larger run was performed on the Illumina HiSeq 2500 at the Center for Advanced Technology at UCSF in rapid run mode to get 100 bp single-end reads.

#### ***RNA-seq Analysis***

RNA-seq reads were trimmed with Cutadapt (<https://code.google.com/p/cutadapt/>) to remove any adapter read-through at the 3' ends of reads, and then with Trimmomatic (<http://www.usadellab.org/cms/?page=trimmomatic>) to remove 5' adapter sequence, before quality filtering with FASTX-Toolkit ([http://hannonlab.cshl.edu/fastx\\_toolkit/index.html](http://hannonlab.cshl.edu/fastx_toolkit/index.html)). Trimmed and filtered reads were then mapped to the genome assembly using Bowtie 2 (<http://bowtie-bio.sourceforge.net/bowtie2/index.shtml>). We ran Bowtie 2 in local mode so that reads at exon-exon junctions would be more accurately mapped.

#### ***Assessment of assembly by Identification of Core Eukaryotic Genes***

We used CEGMA (v 2.5) to analyze the *Stentor* genome for core eukaryotic genes, using the default parameters. From this analysis, we found 202 of the 248 core eukaryotic genes defined by CEGMA. Following the approach of Swart et al, we reduced the restrictions of the CEGMA search in order to find evidence for the remaining genes. Briefly, using hmmscan (HMMER 3.1b1/May 2013; <http://hmmer.org/>), we searched the Pfam-A HMM profiles in order to assign each Eukaryotic Orthologous Groups (KOG) to the best Pfam domain. A domain was assigned to a KOG if it was the best domain assignment for the majority of KOG members and had a domain, full-sequence E-value < 1e-3. We then used these Pfam domains to search all detected ORFs in the *Stentor* genome using hmmscan with a domain, full-sequence e-value < 1e-3. From this search we identified 29 additional core eukaryotic genes. Finally, for the remaining KOGs, we searched the EggNOG database for updated HMMs [S18]. We repeated the scan of all detected ORFs and then verified hits with a BLAST search. Using this approach, we detected 12 additional COGs. In total, the sequenced *Stentor* genome contains strong evidence for 243/248 core eukaryotic genes (indicating that 98% of core genes are present in the assembly). The missing five include KOG2719 (a metalloprotease), KOG1523 (an actin-related protein member of the Arp2/3 complex), KOG2311 (NAD/FAD-utilizing protein involved in translation), KOG1712 (adenine phosphoribosyl transferases), and KOG2653 (6-phosphogluconate dehydrogenase).

#### ***Gene Predictions***

We generated a set of 307 hand curated gene models that were verified by Sanger sequencing of cDNA and/or RNA-seq data. We note that all introns verified by sequencing were either 15 or 16 bases. Of these 70% were single exon genes. The rest included at least 1 15-16 base intron (22% included 1 such intron, 6% included 2 introns, and 1% included at least 3 introns). We used Augustus (3.0.2) [S19,S20] to perform gene predictions, only training with gene models which were <70% identical at the protein level as according to Augustus documentation. In order to detect the appropriate minimum intron length, we altered the source code (filename: extrinsic.cc) so that the minimum intron length possible is 9 bases (the default is 39). Additionally, we altered the parameters of the signal models to be the minimum length possible (filename: intronmodel.cc, types.cc) (personal communication, Mario Stanke). After recompiling Augustus, we used the instructions found here as a guide (<http://bioinf.uni-greifswald.de/augustus/binaries/tutorial/training.html>) and trained Augustus for *Stentor*'s genes using half of our hand curated gene models, testing on the other half. Under these conditions, 90.6% of the testing set was predicted exactly at the gene level, 88.6% of the exons were predicted exactly and 91.2% of the predicted exons were exactly as in the test set.



In order to generate hints for introns for gene predictions, we used Tophat2 (v2.0.11) [S21] to align RNAseq reads from vegetative cells to the repeat masked *Stentor* genome (in order to ensure small introns are detected, we used the following flags: tophat2 -i 9 -I 101 --min-segment-intron 9 --min-coverage-intron 9 --max-segment-intron 101 --max-coverage-intron 101). Since we did not have a significant number of sequenced UTRs in our gene models, we did not include these in our gene predictions. In addition to intron hints, we used the above Tophat output to generate exon hints following the instructions here: <http://bioinf.uni-greifswald.de/bioinf/wiki/pmwiki.php?n=IncorporatingRNAseq.GSNAP>. We then ran Augustus with the following flags, including both intron and exon hints: --alternatives-from-evidence=true --hintsfile=hints.gff --allow\_hinted\_splicesites=atac.

Upon further Sanger sequencing of a subset of predicted gene models, we found that the only verifiable gene models were those that were single exons or contained introns of 15 or 16 bases. Introns of different length most often appeared to arise due to genome mis-assembly (i.e. the gene model contained an N). Additionally, we only found support for gene models that included an GTR-AG (R = A or G) splicing signal. Furthermore, we found that some predicted genes models were in fact falsely joined gene models. We wrote a Perl script to filter any gene models that met these criteria from the final set we used for all downstream analysis. In the case of falsely joined gene models, we simply split the models based on the presence of stop and start codons.

In an effort to predict the lengths of UTRs genome wide, we combined both our RNAseq data and predicted gene models. Searching upstream/downstream of a predicted gene 's start/stop codons, we marked the start and stop coordinates of the UTRs as the first/last points at which reads aligned to the genome adjacent to a gene but outside the ORF.

### ***Analysis of extent of genome duplication based on synteny***

We sought to explain whether the apparent expansion of genes in the *Stentor* genome was due to genome duplication or gene duplication events. To this end, following the methods of Aury et al [S22], we found all reciprocal best blast hits (RBBHs) among the translated gene models. Using blastp, we compared all translated gene models against each other, retaining those hits with an e-value <1e-5. A pair of genes is considered to be a best blast hit if the reciprocal search has the same e-value. A gene can have no more than 5 RBBH pairs. Restricting our search for genome duplication events to the universe of RBBHs, we slid a window containing 10 RBBHs across each contig. If 60% of the RBBHs within a window paired with a window on another contig, this was considered a paralogous block. Contiguous blocks were merged if they paired with a common contig. We repeated the analysis for the *Paramecium tetraurelia* genome (version 99.13) and the *Tetrahymena thermophila* genome (June 2014 version). Results were visualized using Circos version 0.69 [S23]. Since the initial conditions we used were optimized for the *Paramecium tetraurelia* genome, we extended this analysis by varying the window sizes and proportion of RBBHs required to define a syntenic region (Supplemental Figure S2, panel C). We note that not all contigs were long enough to contain the minimum of 10 RBBHs to be used for this analysis. These short contigs are still included in Figure 2A, and account for the lack of syntenic blocks in the upper left half of the Circos plot. These contigs account for 29% of the assembly.

### ***Phylogenetic analysis***

We used rnammer (v. 1.2) [S24] to identify the genomic region that corresponds to *Stentor*'s ribosomal RNA and found that contig\_2227 contained the 18S and 8S ribosomal subunits. This was confirmed by blastn to the nt database. For 18S rRNA comparisons, we downloaded the following sequences from NCBI: *Oxytricha trifallax*--FJ545743, *Stylonychia lemnae*--AM086653, *Euplotes crassus*--AJ305255.1, *Tetrahymena thermophila*—M10932, *Ichthyophthirius multifiliis*—IMU17354; *Paramecium tetraurelia*—AB252009, *Blepharisma japonicum*--AM713185.1 and an outgroup, human NR\_003286.2. Using Geneious, we performed a multiple sequence alignment with clustalW using the default parameters. We then used the Geneious tree builder to build a neighbor-joining tree using an HKY substitution model with human as the root of the tree.

### ***Genetic code analysis using MS Data***

In order to identify the tRNA genes encoded by *Stentor*'s genome, we searched the genome using tRNAscan-SE with the default settings (v. 1.23) [S25]. Similarly, we searched the genomes of *Oxytricha trifallax*, *Paramecium tetraurelia*, *Ichthyophthirius multifiliis* and *Tetrahymena thermophila*. Evidence for the remaining ciliates genetic code was gathered from the literature – *Blepharisma* [S2], *Euplotes* [S2], and *Stylonychia* [S26]. For human, the genetic code was obtained from the Genomic tRNA database (<http://gtrnadb.ucsc.edu>).

To further understand the genetic code usage by *Stentor* we used proteomic information obtained by mass spectrometry analysis of total cellular protein. Whole-cell protein samples were prepared by snap freezing cells,



lysing in buffer in the presence of protease inhibitors (Roche), precipitating the protein with 10% TCA and then removing the lipid by acetone extraction. Proteins were resuspended, digested with trypsin and analyzed using a Q-Exactive hybrid quadrupole mass spectrometer (Thermo Scientific). We then used the mass spectra to test which genetic code gives the most consistent predictions for peptides based on the assembled genome. We translated the genome in 6 frames using three genetic code tables (standard, ciliate and *Blepharisma*). Peptides identified through Mass-spec were aligned to these translations using ProteinPilot (SCIEX) version 5.0 with the Paragon Algorithm. The AB Sciex search engine ProteinPilot™ v. 5.0 (Revision Number 4769) with the Paragon™ Method algorithm 5.0.0.0, 4767 (Shilov et al, 2007) was employed for peptide and ORF identification. A total of 51306 non-empty spectra were searched utilizing the following parameter settings: Identification for “Sample Type”; Iodoacetamide for “Cys Alkylation”; Trypsin for “Digestion”; Orbi-FT MS (1-3 ppm)/LTQ MSMS for “Instrument”; None for “Species”; Thorough ID for “Search Effort”; Biological modifications Variants: Evolutionary for “ID Focus”; Yes for “FDR Analysis”; No for “User Modified Parameter Files”; and 2 for “Competitor Error Margin (ProtScore)”. “Detected Protein Threshold” was set to 0.05 (10.0%).

Using the most confident peptide alignments determined by the Paragon algorithm (peptide identification threshold greater than 95% confident), we searched for cases where codons encoded alternative amino acids as in the genetic code employed by many model ciliates (UAR encodes glutamine), another employed by *Blepharisma* (UGA encodes tryptophan) and a third employed by few ciliates (UAR encodes glutamic acid). We wrote a custom script to identify open reading frames (ORFs) in the *Stentor* genome using these genetic codes in all six frames, defining an ORF as occurring between two stop codons. We then used a custom script to find cases where a mass spec peptide was found in an ORF. The vast majority of alternative codons used corresponded to read-through events. For every predicted gene model, we defined a read-through event as the extrapolated peptides that would occur if read-through occurred at the stop codon (i.e., a stop codon was translated to a Q, E, or W if it were a UAA/UAG or UGA). We then searched for evidence of support of the read through peptides using mass spec data and found that these events accounted for the majority of occurrences of alternative codon uses. If the alternative codons were found in an open reading frame, we BLASTed the translation of the ORF using the alternative encodings as well as the standard encodings. When the BLAST hit for a standard ORF was better or the same as that of the alternative encoding, this was considered good evidence for a read-through event. Otherwise, the alternative encoding for an ORF was examined more closely and verified using BLAST as well as manual inspection of the mass spectra for the underlying peptides.

In addition to the dominant class of alternative stop codon-containing ORFs described in the main text (those that matched better with the standard code, suggesting translational read-through), a smaller fraction of the ORFs (13% Ciliate; 14% *Blepharisma* table; 6% UAR-glutamate), showed a better BLAST hit when translated using the alternative codon table than did the corresponding ORF translated with the standard table. But all of these cases, homology was only found to predicted or poorly annotated proteins (e-value < 1e-5, percent identity > 20), suggesting the ORFs in question may not correspond to actual protein encoding genes. The remaining ORFs translated with alternative codon tables (1.6% Ciliate; 6.9% *Blepharisma*; 1% UAR-glutamate) did not have a corresponding standard ORF at all, and in all cases these ORFs did not show strong homology to the BLAST database, again suggesting that many of them may be spurious ORFs that do not correspond to protein coding genes. Finally, two ORFs translated by the Ciliate and *Blepharisma* tables, each of which lacked a corresponding standard ORF, exhibited strong homology to a *Tetrahymena* small nuclear ribonucleoprotein.

### **Calculation of Intergenic Lengths**

To calculate the intergenic lengths in the *Stentor* genome and to avoid any bias that might arise from genes that were not predicted by Augustus, we included open reading frames (ORFs) of a minimal length of 450 nt. We found these ORFs using getorf [S27].

### **Estimating Ploidy by Droplet Digital PCR**

Single cell DNA samples were prepared as described above, and 2 μL of the sample were used as the DNA template in the ddPCR reaction using the following primers:

| Contig | Forward Primer | Reverse Primer | Probe |
|--------|----------------|----------------|-------|
|--------|----------------|----------------|-------|

|                        |                               |                              |                                  |
|------------------------|-------------------------------|------------------------------|----------------------------------|
| SteCoe_contig_2        | AAAGATGGCCAAGT<br>CAAAG       | TCGTTCTAATCCTGCCATA<br>TCC   | AGTCCAGATCCTACAA<br>TTGGAGTATGT  |
| SteCoe_contig_18       | TGTA CTGCTCAAAGGT<br>ACACTAAG | CATTGATGCAGCTTGAAG<br>ATAAGG | CACCTTCAGACGATTGC<br>TCATTCATTGC |
| SteCoe_contig_43       | ACCTTCTTCCACATCA<br>CAATCT    | AGAGATCATGGGAGGTTA<br>TAGGA  | ACCCATCATCCAACATC<br>CTCCTCTCT   |
| SteCoe_contig_55<br>8  | CCTACTCGGCCATCA<br>AATC       | TCAGAAGCTAGCTCAGGA<br>TACA   | TGCACAGACCAAATCC<br>CATTGTCTCT   |
| SteCoe_contig_22<br>27 | CCTACCGATTTCGAGT<br>GATGAG    | CCTTGTTACGACTTCTCCT<br>TCC   | TACTCAACTCCCAACG<br>CCGAAGC      |
| pPR-T4P Plasmid        | CTACATACCTCGCTCT<br>GCTAATC   | GCGCCTTATCCGGTAACTA<br>TC    | AAGACACGACTTATCG<br>CCTACTGGC    |

Dual labeled probes were ordered with either 5'-FAM or 5'-HEX as the fluorescent indicator and ZEN-Iowa Black quenchers (Integrated DNA Technologies, Inc., Coralville, IA). ddPCR reactions were prepared using the 2x ddPCR Supermix (Bio-Rad) with target amplification primers (900 nM) and probes (500 nM) on the QX100 ddPCR system (Bio-Rad). Droplet generation, PCR, and droplet detection were performed following the QX100 system protocols (Bio-Rad). Briefly, 25  $\mu$ L PCR samples were loaded onto 8-well cartridges with 65  $\mu$ L of droplet generation oil and placed on the droplet generator (Bio-Rad). Droplets were then loaded onto 96-well PCR plates, heat-sealed, and PCR was performed on a standard thermal cycler. Plates were then transferred to the QX100 droplet reader (Bio-Rad) and analysis was performed using QuantaSoft (Bio-Rad). In order to determine the ploidy of a single cell, the "copies-per-microliter" value was multiplied by 250 to account for both the 25  $\mu$ L PCR volume and initial sample volume of 20  $\mu$ L. In this analysis, cells started off at varying sizes and were not surgically manipulated. In order to correct for variation in reaction loading volumes, each ddPCR reaction was performed with two probe sets, one specific for a given contig, and one specific for contig\_558 which was used as a standard. The measured value for contig\_558 should be identical across all ddPCR reactions for an individual cell, but in reality this number varied slightly among reactions. To normalize all of the separate ddPCR reactions for a given cell and account for this variation in the standard, the average measured values for contig\_558 were used to normalize the measured values for the other contigs, according to the relation  $(\text{Measured\_ploidy} / \text{normalized\_ploidy}) = (\text{Measured\_558} / \text{Average\_558})$ . Reproducibility of the measurement was assessed by analyzing two different, non-overlapping probe sets on two contigs (contigs 2 and 2227). This was done for eight cells, and the correlation coefficients between the two probes on each contig were 0.99 and 0.99, respectively. Because of the high correlation observed, single probes were used for the analysis reported in the text.

### 3'UTR Lengths

We performed 3' RACE on a selected group of genes, and Sanger sequenced the RACE products. Next, we took RNAseq reads with polyA tails and mapped them to our set of *Stentor* protein coding regions with Bowtie2. In both cases we found the 3' UTR length by measuring the distance between the stop codon and the polyA tail.

In a given gene, the poly(A) tail often initiated at slightly different sites across different reads. Some poly(A) tails initiated directly after the stop codon, effectively indicating the absence of a 3' UTR. 82% of 3' UTRs examined in RNAseq data were less than 50 bp. Such short UTRs would be too short to encode a SECIS element in the case of a selenoprotein. As *Stentor* does encode a UGA-selenocysteine tRNA, we looked for examples of putative selenoprotein-coding genes. We found 7 homologs of glutathione peroxidase and a homolog of thioredoxin reductase that all appear to contain an in-frame UGA codon (**Supplemental Table S5**). All eight of these genes

possess 3' UTRs in the 83-139 bp range and appear to encode the stem-loop SECIS elements required for selenocysteine incorporation.

### **Orthology Grouping of *Stentor* Gene Models**

The predicted proteomes of *Stentor coeruleus*, *Tetrahymena thermophila*, *Paramecium tetraurelia*, and *Oxytricha trifallax* were analyzed by OrthoMCL (<http://www.orthomcl.org/>) [S28] for assignment into curated ortholog groups, which uses all-to-all BLASTP searches followed by Markov clustering. While *Tetrahymena* is already present in the OrthoMCL database, this is a previous version of the gene predictions, and we found that the current predicted proteome contained some proteins that didn't match anything in the database. After this initial step, genes from the four ciliates that didn't match any of the curated groups were then pooled together and reanalyzed in OrthoMCL to predict ciliate-specific co-orthologs. *Tetrahymena*-specific ortholog groups from the curated database were also added to the ciliate-specific count.

To find kinase domains, profile HMMs for all the kinase family domains in Kinbase (<http://kinbase.com/kinbase/>) were downloaded. The *Stentor* predicted proteins were searched with these profiles using HMMER3 (<http://hmmer.org>) with an e-value cutoff of 0.05. Hits were confirmed with BLASTP against a custom database of all the kinase domain sequences found in kinbase (<http://kinbase.com/web/current/>).

### **Supplemental References**

- S1 Swart, E.C., Serra, V., Petroni, G., and Nowacki, M. (2016). Genetic Codes with No Dedicated Stop Codon: Context-Dependent Translation Termination. *Cell* 166:691–702.
- S2 Lozupone, C.A., Knight, R.D., and Landweber, L.F. (2001). The molecular basis of nuclear genetic code change in ciliates. *Current Biology* 11, 65–74.
- S3 Farmer, S., Leung, W.-K., and Tsubouchi, H. (2011). Characterization of Meiotic Recombination Initiation Sites Using Pulsed-Field Gel Electrophoresis. *DNA Recombination*, v745, 33–45.
- S4 Marçais, G., and Kingsford, C. (2011). A fast, lock-free approach for efficient parallel counting of occurrences of k-mers. *Bioinformatics* 27, 764–70.
- S5 Li R, Zhu H, Ruan J, Qian W, Fang X, Shi Z, Li, Y., Li, S., Shan, G., Kristiansen, K., et al. (2010). De novo assembly of human genomes with massively parallel short read sequencing. *Genome Res.* 20, 265–72.
- S6 Ruby, J.G., Bellare, P., and DeRisi, J.L. (2013). PRICE: software for the targeted assembly of components of (Meta) genomic sequence data. *G3 (Bethesda)* 3, 865–80.
- S7 Kent, W.J. (2002). BLAT--the BLAST-like alignment tool. *Genome Res.* 12, 656–64.
- S8 Altschul, S.F., Gish, W., Miller, W., Myers, E.W., and Lipman, D.J. (1990). Basic local alignment search tool. *J. Mol. Biol.* 215, 403–10.
- S9 Uricaru, R., Rizk, G., Lacroix, V., Quillery, E., Plantard, O., Chikhi, R., Lemaitre, C., and Peterlongo, P. (2014). Reference-free detection of isolated SNPs. *Nucleic Acids Res.* 43,e11.
- S10 Danecek, P., Auton, A., Abecasis, G., Albers, C.A., Banks, E., DePristo, M.A., Handsaker, R.E., Lunter, G., Marth, G.T., Sherry, S.T., et al. (2011). The variant call format and VCFtools. *Bioinformatics* 27, 2156–8.
- S11 Li, H., Handsaker, B., Wysoker, A., Fennell, T., Ruan, J., Homer, N., Marth, G., Abecasis, G., and Durbin, R. (2009). The Sequence Alignment/Map format and SAMtools. *Bioinformatics* 25, 2078–9.
- S12 Li, H. (2011). A statistical framework for SNP calling, mutation discovery, association mapping and population genetical parameter estimation from sequencing data. *Bioinformatics* 27, 2987–93.
- S13 Li, H. (2011). Improving SNP discovery by base alignment quality. *Bioinformatics* 27, 1157–8.
- S14 McKenna, A., Hanna, M., Banks, E., Sivachenko, A., Cibulskis, K., Kernytsky, A., Garimella, K., Altschuler, D., Gabriel, S., Daly, M., et al. (2010). The Genome Analysis Toolkit: a MapReduce framework for analyzing next-generation DNA sequencing data. *Genome Res* 20, 1297–303.
- S15 DePristo, M.A., Banks, E., Poplin, R., Garimella, K.V., Maguire, J.R., Hartl, C., Philippakis, A.A., del Angel, G., Rivas, M.A., Hanna, M., et al. (2011). A framework for variation discovery and genotyping using next-generation DNA sequencing data. *Nat Genet* 43, 491–8.
- S16 Van der Auwera, G.A., Carneiro, M.O., Hartl, C., Poplin, R., del Angel, G., Levy Moonshine, A., Jordan, T., Shakir, K., Roazen, D., Thibault, J., et al. (2013). From FastQ Data to High-Confidence Variant Calls: The Genome Analysis Toolkit Best Practices Pipeline. *Curr. Protoc. Bioinformatics* 43, 11.10.1
- S17 Swart, E.C., Bracht, J.R., Magrini, V., Minx, P., Chen, X., Zhou, Y., Khurana, J.S., Goldman, A.D., Nowacki, M., Schotanus, K, et al. (2013). The *Oxytricha trifallax* Macronuclear Genome: A Complex Eukaryotic Genome with 16,000 Tiny Chromosomes. *PLoS Biol.* 11, e1001473.

- S18 Huerta-Cepas, J., Szklarczyk, D., Forslund, K., Cook, H., Heller, D., Walter, M.C., Rattei, T., Mende, D.R., Sunagawa, S., Kuhn, M., et al. (2016). eggNOG 4.5: a hierarchical orthology framework with improved functional annotations for eukaryotic, prokaryotic and viral sequences. *Nucleic Acids Res.* 44, D286–93.
- S19 Stanke, M., and Waack, S. (2003). Gene prediction with a hidden Markov model and a new intron submodel. *Bioinformatics* 19 Suppl 2:ii215–25.
- S20 Stanke, M., Diekhans, M., Baertsch, R., and Haussler, D. (2008). Using native and syntenically mapped cDNA alignments to improve de novo gene finding. *Bioinformatics* 24, 637–44.
- S21 Kim, D., Pertea, G., Trapnell, C., Pimentel, H., and Kelley, R. (2013). TopHat2: accurate alignment of transcriptomes in the presence of insertions, deletions and gene fusions. *Genome Biol.* 14, R36.
- S22 Aury, J.-M., Jaillon, O., Duret, L., Noel, B., Jubin, C., Porcel, B.M., Segurens, B., Daubin, V., Anthouard, V., Alach, N., et al. (2006). Global trends of whole-genome duplications revealed by the ciliate *Paramecium tetraurelia*. *Nature* 444, 171–8.
- S23 Krzywinski, M.I., Schein, J.E., Birol, I., Connors, J., Gascoyne, R., Horsman, D., Jones, S.J., and Marra, M.A. (2009). Circos: An information aesthetic for comparative genomics. *Genome Res.* 19, 1639–45.
- S24 Lagesen, K., Hallin, P., Rødland, E.A., Staerfeldt, H.-H., Rognes, T., and Ussery, D.W. (2007). RNAmmer: consistent and rapid annotation of ribosomal RNA genes. *Nucleic Acids Res* 35, 3100–8.
- S25 Lowe, T.M., and Eddy, S.R. (1997). tRNAscan-SE: a program for improved detection of transfer RNA genes in genomic sequence. *Nucleic Acids Res* 25, 955–64.
- S26 Aeschlimann, S.H., Jönsson, F., Postberg, J., Stover, N.A., Petera, R.L., Lipps, H.-J., Nowacki, M., and Swart, E.C. (2014). The draft assembly of the radically organized *Stylonychia lemnae* macronuclear genome. *Genome Biol. Evol.* 6, 1707–23.
- S27 Rice, P., Longden, I., and Bleasby, A. (2000). EMBOSS: the European Molecular Biology Open Software Suite. *Trends Genet.* 16, 276–7.
- S28 Chen, F., Mackey, A.J., Stoeckert, C.J., and Roos, D.S. (2006). OrthoMCL-DB: querying a comprehensive multi-species collection of ortholog groups. *Nucleic Acids Res* 34, D363–8.
- S29 Wang, R., Xiong, J., Wang, W., Miao, W., and Liang, A. (2016). High frequency of +1 programmed ribosomal frameshifting in *Euplotes octocarinatus*. *Sci. Rep.* 6, 21139.
- S30 Hamilton, E.P., Kapusta, A., Huvos, P.E., Bidwell, S.L., Zafar, N., Tang, H., Hadjithomas, M., Kirshnakumar, V., Badger, J.H., Caler, E.V., et al. (2016). Structure of the somatic germline genome of *Tetrahymena thermophila* and relationship to the massively rearranged somatic genome. *Elife* 5, e19090.
- S31 Coyne, R.S., Hannick, L., Shanmugam, D., Hostetler, J.B., Bami, D., Joardar, V.S., Johnson, J., Radune, D., Singh, I., Badger, J.H., et al. (2011). Comparative genomics of the pathogenic ciliate *Ichthyophthirius multifiliis*, its free-living relatives and a host species provide insights into adoption of a parasitic lifestyle and prospects for disease control. *Genome Biol* 12, R100.
